# Supplementary material for: Clinical roles of the aberrantly expressed lncRNAs in lung squamous cell carcinoma: a study based on RNA-sequencing and microarray data mining
Source: PubMed Central journal article supplement (PMC5617423; doi:10.18632/oncotarget.18058), 2017-05-22
Supplement: oncotarget-08-61282-s001.pdf [file oncotarget-08-61282-s001.pdf]

## Clinical roles of the aberrantly expressed lncRNAs in lung squamous cell carcinoma: a study based on RNA-sequencing and microarray data mining

### SUPPLEMENTARY MATERIALS

Supplementary Table 1: Univariate and multivariate cox analyses for the ten lncRNAs in LUSC

| Variables   | Univariate |       |       |       | Multivariate |       |       |       |
|-------------|------------|-------|-------|-------|--------------|-------|-------|-------|
|             | P          | HR    | LL    | UL    | P            | HR    | LL    | UL    |
| SFTA1P      | 0.004      | 1.573 | 1.154 | 2.145 | 0.019        | 1.550 | 1.073 | 2.240 |
| LINC01272   | 0.019      | 1.441 | 1.062 | 1.954 | 0.299        | 1.223 | 0.836 | 1.788 |
| GATA6-AS1   | 0.052      | 1.356 | 0.997 | 1.843 | 0.767        | 1.056 | 0.736 | 1.516 |
| MIR3945HG   | 0.014      | 1.480 | 1.083 | 2.022 | 0.376        | 1.180 | 0.818 | 1.701 |
| LINC00968   | 0.118      | 1.276 | 0.940 | 1.730 |              |       |       |       |
| LINC00961   | 0.077      | 1.316 | 0.971 | 1.785 |              |       |       |       |
| LINC01572   | 0.356      | 0.867 | 0.640 | 1.174 |              |       |       |       |
| RP1_78014.1 | 0.207      | 1.216 | 0.897 | 1.647 |              |       |       |       |
| FENDRR      | 0.609      | 1.082 | 0.800 | 1.465 |              |       |       |       |
| LINC01314   | 0.439      | 1.128 | 0.831 | 1.532 |              |       |       |       |
